# Supplementary material for: Comparing a Multimedia Digital Informed Consent Tool With Traditional Paper-Based Methods: Randomized Controlled Trial
Source: PubMed Central journal article supplement (PMC8564662; doi:10.2196/20458), 2021-10-19
Supplement: formative_v5i10e20458_app2.pdf [file formative_v5i10e20458_app2.pdf]

**Please estimate how long you will spend completing the forms and informed consent for this VIC research study: \_\_\_\_\_ minutes**

**Please read each statement carefully, and check the SINGLE BEST RESPONSE.**

1. Why did we ask you to participate in this study?

- To gather samples for lung diseases research.
- To test a new asthma medicine.
- To provide samples for cancer research.
- All of the above.

2. Which of the following are benefits of this study?

- It will make me receive better care at the clinic.
- It may help in finding new discoveries about lung diseases.
- There are no benefits.
- All of the above.

3. Which of the following procedures is part of the study?

- Blood draw.
- Lung function testing.
- Sputum collection.
- All of the above.

4. Which of the following is true if you choose to participate?

- A sample of your blood will be collected and stored for research.
- You cannot quit without our approval.
- You will not be asked to participate in lung function test.
- You will be get large payment if we discover new medicine.

5. Which of the following is an expected risk from participating in the study?

- You may feel faint or dizzy during blood collection
- You may start to wheeze or cough following these tests.
- The test will be monitored closely and it will be stopped if your breathing or lung function gets worse.
- All of the above.

6. While you are in this research study, what will happen to your personal health information?

- It will be shared by the researchers with anyone who asks for it.
- It will not be collected or used by researchers in this research study.
- It will be used by my personal physician ONLY.
- It will be shared with physicians, nurses and staff working on this research study ONLY.

7. In which of the following circumstances can you stop participating in the study?

- Your participation in this study is voluntary, you can stop being in the study at any time.
- If you chose to stop being in the study, no one will treat you differently and you will not be penalized.
- If you chose to stop being in the study, the data obtained from the specimens up to the point of your withdrawal will continue to be used.
- All of the above.

8. How can you withdraw from this study?

- Call my healthcare provider
- Call my insurance company
- Call Yale University
- Call the head of the study, Dr. Geoffrey Chupp.

9. Who can you call if you have questions about your rights as a participant in this study?

- You may contact the head of the study, Geoffrey Chupp.
- You may contact the Human Investigation Committee.
- You can contact the Yale Privacy Officer.
- All of the above.

10. Regarding your participation in the study, please check **TRUE** or **FALSE** for the following statements.

|                                                                                                                                         | <b>True</b>              | <b>False</b>             |
|-----------------------------------------------------------------------------------------------------------------------------------------|--------------------------|--------------------------|
| Your driver's license number will be collected for purposes of this study                                                               | <input type="checkbox"/> | <input type="checkbox"/> |
| To participate in this study, you need to provide blood sample                                                                          | <input type="checkbox"/> | <input type="checkbox"/> |
| If you are injured while participating in this study, You or your insurance carrier will be expected to pay the costs of this treatment | <input type="checkbox"/> | <input type="checkbox"/> |
| If you participate in the procedures for this study, you will be paid for your time                                                     | <input type="checkbox"/> | <input type="checkbox"/> |

**On a scale of 1 to 7, How well do you understand the following statements?  
 DIDN'T UNDERSTAND THE ITEM AT ALL, CHECK 1. UNDERSTOOD IT VERY WELL, CHECK 7.**

|                                                                                         | I did not understand this at all $\longleftrightarrow$ I understood this very well |   |   |   |   |   |   |
|-----------------------------------------------------------------------------------------|------------------------------------------------------------------------------------|---|---|---|---|---|---|
| Whom you should contact if you have questions or concerns related to the research study | 1                                                                                  | 2 | 3 | 4 | 5 | 6 | 7 |
| Who will have access to your protected health information                               | 1                                                                                  | 2 | 3 | 4 | 5 | 6 | 7 |
| What will happen if you choose to participate in this research study                    | 1                                                                                  | 2 | 3 | 4 | 5 | 6 | 7 |
| How you can stop participating in the study                                             | 1                                                                                  | 2 | 3 | 4 | 5 | 6 | 7 |

**On a scale of 1 to 7, How satisfied were you with the following statements?  
 VERY DISSATISFIED, PLEASE CHECK 1. VERY SATISFIED, PLEASE CHECK 7.**

|                                                                                                              | Very dissatisfied $\longleftrightarrow$ Very satisfied |   |  |   |   |   |   |   |
|--------------------------------------------------------------------------------------------------------------|--------------------------------------------------------|---|--|---|---|---|---|---|
| Your ability to complete the informed consent process for this research study on your own, without any staff | 1                                                      | 2 |  | 3 | 4 | 5 | 6 | 7 |
| The time required to complete the informed consent process.                                                  | 1                                                      | 2 |  | 3 | 4 | 5 | 6 | 7 |
| The overall informed consent process                                                                         | 1                                                      | 2 |  | 3 | 4 | 5 | 6 | 7 |

**On a scale of 1 to 7, How long do you think the informed consent process was?  
 A VERY LONG PROCESS, PLEASE CHECK 1. A VERY SHORT PROCESS, PLEASE CHECK 7.**

|                                                                           |                                            |   |   |   |   |   |   |
|---------------------------------------------------------------------------|--------------------------------------------|---|---|---|---|---|---|
|                                                                           | Very long $\longleftrightarrow$ Very short |   |   |   |   |   |   |
| Thinking about the entire “informed consent process” would you say it was | 1                                          | 2 | 3 | 4 | 5 | 6 | 7 |

**On a scale of 1 to 7, How difficult did you feel the informed consent process was?  
 VERY DIFFICULT, PLEASE CHECK 1. VERY EASY, PLEASE CHECK 7.**

|                                                            |                                                |   |   |   |   |   |   |
|------------------------------------------------------------|------------------------------------------------|---|---|---|---|---|---|
|                                                            | Very difficult $\longleftrightarrow$ Very easy |   |   |   |   |   |   |
| The process of completing the informed consent process was | 1                                              | 2 | 3 | 4 | 5 | 6 | 7 |

**On a scale of 1 to 7, How likely are you to participate in a future clinical trial.  
NOT LIKELY AT ALL, PLEASE CHECK 1. VERY LIKELY, PLEASE CHECK 7.**

|                                                                                                                           |                                                                                                                                                             |   |   |   |   |   |   |
|---------------------------------------------------------------------------------------------------------------------------|-------------------------------------------------------------------------------------------------------------------------------------------------------------|---|---|---|---|---|---|
|                                                                                                                           | <div style="display: flex; justify-content: space-between; align-items: center;"> <span>Very unlikely</span> <span>↔</span> <span>Very likely</span> </div> |   |   |   |   |   |   |
| How likely are you to join another research study?                                                                        | 1                                                                                                                                                           | 2 | 3 | 4 | 5 | 6 | 7 |
| Would you recommend that research studies in the future use the same type of informed consent format used for THIS study? | 1                                                                                                                                                           | 2 | 3 | 4 | 5 | 6 | 7 |

**On a scale of 1 to 7, How important was the informed consent process in your decision to participate in this clinical research study?  
NOT IMPORTANT AT ALL, PLEASE CHECK 1. VERY IMPORTANT, PLEASE CHECK 7.**

|                                                                                                                  |                                                                                                                                                                       |   |   |   |   |   |   |
|------------------------------------------------------------------------------------------------------------------|-----------------------------------------------------------------------------------------------------------------------------------------------------------------------|---|---|---|---|---|---|
|                                                                                                                  | <div style="display: flex; justify-content: space-between; align-items: center;"> <span>Not important at all</span> <span>↔</span> <span>Very important</span> </div> |   |   |   |   |   |   |
| Please rate how important the informed consent process was in your decision to participate in the research study | 1                                                                                                                                                                     | 2 | 3 | 4 | 5 | 6 | 7 |
